# Supplementary material for: Qihuang Zhuyu Formula Attenuates Atherosclerosis via Targeting PPARγ to Regulate Cholesterol Efflux and Endothelial Cell Inflammation
Source: Oxid Med Cell Longev. 2022 Dec 5;2022:2226168. doi: 10.1155/2022/2226168 (PMC9744610; doi:10.1155/2022/2226168)
Supplement: Supplementary Materials — Supplementary 1. Supplementary Table S1: seventy-eight kinds of active components in QHZYF were identified by UPLC-Q-TOF/MS. Supplementary 2. Supplementary Table S2: the primer sequences used in RT-qPCR experiments. [file 2226168.f1.docx]

**Supplementary Table S1**

| **Sequence number** | **Retention time** | **Ion mode** | **Components** | **Formula** | **mw** | **Calcd** | **Obsed** | **Error** | **MS/MS** | **Attribution** | |
| --- | --- | --- | --- | --- | --- | --- | --- | --- | --- | --- | --- |
| ***m/z*** | ***m/z*** | **(ppm)** |
| 1 | 0.83 | [M-H]- | Genipingentiobioside | C23H34O15 | 550.1898 | 549.1819 | 549.1827 | 1.46 | 385.1157[M-H-C5H13O5]- | Leech | |
| 421.1081[M-H-C3H13O5]- |
| 431.1165[M-H-C5H11O3]- |
| 439.0854[M-H-C4H15O3]- |
| 499.1754[M-H-H3O3]- |
| 2 | 0.84 | [M-H]- | D-mannoheptulose | C7H14O7 | 210.074 | 209.0661 | 209.0662 | 0.48 | 89.0288[M-H-C4H9O4]- | Leech | |
| 119.0412[M-H-C3H7O3]- |
| 143.0414[M-H-CH7O3]- |
| 161.0465[M-H-CH5O2]- |
| 179.0613[M-H-CCH3O]- |
| 3 | 1 | [M+Cl]- | 10-O-Methyl protosappanin b | C17H18O6 | 318.1103 | 353.0792 | 353.0764 | 7.93 | 133.0203[M-H-C9H13O4]- | Sappan Wood | |
| 211.0046[M-H-C5H15O2]- |
| 4 | 1.11 | [M-H]- | Sucrose | C12H22O11 | 342.1162 | 341.1084 | 341.1086 | 0.59 | 341.1086[M-H]- | Milkvetch Root | |
| [M+Cl]- | 377.0851 | 377.0877 | 6.9 | 377.0877[M+Cl]- |
| 5 | 1.3 | [M+CH3COO]- | Bonducellin | C17H14O4 | 282.0892 | 341.1025 | 341.1057 | 9.38 | 341.1057[M+CH3COO]- | Sappan Wood |
| 6 | 2.44 | [M-H]- | Onjixanthone i | C16H14O6 | 302.079 | 301.0712 | 301.0736 | 7.97 | 271.0278[M-H-C2H7]- | Safflower |
| 285.0463[M-H-CH5]- |
| 7 | 2.53 | [M-H]- | 1-Ribityl-2,3-diketo-1,2,3,4-tetrahydro-6,7-dimethyl-quinoxaline | C15H20N2O6 | 324.1321 | 323.1243 | 323.1272 | 8.98 | 323.1272[M-H]- | Safflower |
| 8 | 2.7 | [M+CH3COO]- | Brazilein | C16H12O5 | 284.0685 | 343.0818 | 343.0807 | 3.21 | 229.0530[M-H-C3H3O]- | Sappan Wood |
| 9 | 2.92 | [M-H]- [M+HCOO]- | Hydroxysafflor yellow a | C27H32O16 | 612.169 | 611.1612 657.1667 | 611.1595 657.164 | 2.78 4.11 | 455.1067[M-H-C4H13O6]- | Safflower |
| 461.1476[M-H-C4H7O6]- |
| 463.0889[M-H-C6H13O4]- |
| 473.1080[M-H-C4H11O5]- |
| 491.1227[M-H-C4H9O4]- |
| 10 | 2.94 | [M-H]- | 6-Hydroxykaempferol-7-o-glucoside | C21H20O12 | 464.0955 | 463.0877 | 463.0868 | 1.94 | 257.0593[M-H-C10H7O5]- | Safflower |
| 287.0676[M-H-C9H5O4]- |
| 299.0480[M-H-C9H9O3]- |
| 303.0800[M-H-C9H5O3]- |
| 323.0427[M-H-C7H9O3]- |
| 11 | 3.01 | [M-H]- | Protosappanin a | C15H12O5 | 272.0685 | 271.606 | 271.6055 | 1.85 | 123.0483[M-H-C8H5O3]- | Sappan Wood |
| 148.0200[M-H-C7H8O2]- |
| 163.0450[M-H-C6H5O2]- |
| 229.0538[M-H-C2H3O]- |
| 12 | 3.18 | [M-H]- | Protosappanin c | C16H14O6 | 302.079 | 301.0712 | 301.0736 | 7.97 | 227.0391[M-H-C3H7O2]- | Sappan Wood |
|  | |
| 13 | 3.46 | [M-H]- | Sappanchalcone | C16H14O5 | 286.0841 | 285.0763 | 285.0799 | 12.63 | 158.0382[M-H-C6H8O3]- | Sappan Wood |  | |
| 161.0195[M-H-C7H9O2]- |  | |
| 162.0358[M-H-C7H8O2]- |  | |
| 163.0424[M-H-C7H7O2]- |  | |
| 267.0712[M-H-H3O]- |  | |
| 14 | 3.5 | [M+CH3COO]- | 3,4-Dihydroxyrottlerin | C30H28O10 | 548.1682 | 607.1816 | 607.1795 | 3.46 | 227.0367[M-H-C17H21O6]- | Safflower |  | |
| 229.0546[M-H-C17H19O6]- |  | |
| 232.0729[M-H-C17H16O6]- |  | |
| 241.0557[M-H-C16H19O6]- |  | |
| 243.0689[M-H-C16H17O6]- |  | |
| 15 | 3.5 | [M-H]- | Episappanol | C16H16O6 | 304.0947 | 303.0869 | 303.0864 | 7.59 | 109.0325[M-H-C10H11]- | Sappan Wood |  | |
| 143.0471[M-H-C6H9O5]- |  | |
| 158.0382[M-H-C6H10O4]- |  | |
| 159.0461[M-H-C6H9O4]- |  | |
| 255.0608[M-H-CH5O2]- |  | |
| 16 | 3.65 | [M-H]- | Geniposide | C17H24O10 | 388.1369 | 387.1291 | 387.1249 | 10.85 | 257.0351[M-H-C7H15O2]- | Leech |  | |
| 271.0319[M-H-C3H17O4]- |  | |
| 286.0493[M-H-C2H14O4]- |  | |
| 287.0598[M-H-C2H13O4]- |  | |
| 301.0576[M-H-C5H11O]- |  | |
| 17 | 3.82 | [M-H]- | Neocarthamin | C21H22O11 | 450.1162 | 449.1084 | 449.1064 | 4.45 | 257.0351[M-H-C11H13O3]- | Safflower |  | |
| 271.0319[M-H-C7H15O5]- |  | |
| 286.0493[M-H-C6H12O5]- |  | |
| 287.0598[M-H-C6H11O5]- |  | |
| 18 | 3.85 | [M+HCOO]- | Vitexin xyloside | C26H28O15 | 580.1428 | 625.1405 | 625.1428 | 3.68 | 288.0838[M-H-C14H12O7]- | Manyflower So1omonseal Rhizome |  | |
| 299.0249[M-H-C11H21O8]- |  | |
| 344.0755[M-H-C12H12O5]- |  | |
| 358.0714[M-H-C6H14O7]- |  | |
| 463.1181[M-H-C8H5O]- |  | |
| 19 | 3.94 | [M+CH3COO]- | Uridine | C9H12N2O6 | 244.0695 | 303.0828 | 303.0864 | 11.88 | 303.0864[M+CH3COO]- | Milkvetch Root |  | |
| 20 | 3.98 | [M+Cl]- | 2'-Hydroxy-3',4'-dime thoxy-isoflavane-7-o-β-d-glucoside | C23H32O10 | 468.1995 | 503.1684 | 503.1718 | 6.76 | 503.1718[M+Cl]- | Milkvetch Root |  | |
| 21 | 4.02 | [M-H]- | Saffloryellow | C27H30O16 | 610.1534 | 609.1456 | 609.1409 | 7.72 | 284.0312[M-H-C12H22O10]- | Safflower |  | |
| 285.0361[M-H-C12H21O10]- |  | |
| 447.0869[M-H-C6H11O5]- |  | |
| 448.0734[M-H-C7H14O4]- |  | |
| 22 | 4.08 | [M-H]- | Safflomin a | C27H32O16 | 612.169 | 611.1612 | 611.1595 | 2.78 | 611.1595[M-H]- | Safflower |  | |
| 23 | 4.19 | [M-H]- | 3'-Deoxysappanol | C16H16O5 | 288.0998 | 287.0919 | 287.0904 | 5.23 | 137.0300[M-H-C9H11O2]- | Sappan Wood |  | |
| 24 | 4.27 | [M+HCOO]- | Gardenoside | C17H24O11 | 404.1319 | 449.1295 | 449.125 | 10.02 | 119.0470[M-H-C9H14O10]- | Leech |  | |
| 121.0295[M-H-C10H19O9]- |  | |
| 25 | 4.4 | [M-H]- | Brasilin | C16H14O5 | 286.0841 | 285.0763 | 285.0725 | 13.33 | 227.0355[M-H-C3H7O]- | Sappan Wood |  | |
| 26 | 4.4 | [M-H]- | Safflower yellow a | C27H30O15 | 594.1585 | 593.1506 | 593.1549 | 7.25 | 119.0492[M-H-C19H23O14]- | Safflower |  | |
| 284.0279[M-H-C12H22O9]- |  | |
| 449.1014[M-H-C6H9O4]- |  | |
| 27 | 4.46 | [M-H]- | 3'-Hydroxy-4--methoxyisoflavone-7-o-beta-d-glucoside | C22H22O10 | 446.1213 | 445.1135 | 445.1145 | 2.25 | 160.0422[M-H-C16H14O5]- | Milkvetch Root |  | |
| 161.0249[M-H-C3H17O7]- |  | |
| 163.0385[M-H-C13H15O7]- |  | |
| 223.0700[M-H-C11H11O5]- |  | |
| 267.0662[M-H-C6H11O6]- |  | |
| 28 | 4.65 | [M-H]- | Protosappanin a Dimethyl acetal | C17H18O6 | 318.1103 | 317.1025 | 317.1068 | 13.56 | 227.0350[M-H-C4H11O2]- | Sappan Wood |  | |
| 229.0506[M-H-C4H9O2]- |  | |
| 29 | 4.73 | [M-H]- | Calycosin | C16H12O5 | 284.0685 | 283.0606 | 283.0617 | 3.89 | 148.0116[M-H-C8H8O2]- | Milkvetch Root |  | |
| 268.0334[M-H-CH4]- |  | |
| 30 | 4.92 | [M-H]- | Mannose | C6H12O6 | 180.0634 | 179.0556 | 179.0537 | 10.61 | 179.0537[M-H]- | Manyflower So1omonseal Rhizome |  | |
| 31 | 5.25 | [M-H]- | 3,7-Dihydroxychroman-4-one | C9H8O4 | 180.0423 | 179.0344 | 179.0341 | 1.68 | 151.0402[M-H-CHO]- | Sappan Wood |  | |
| 32 | 5.72 | [M-H]- | 3'-Methoxy-4',5,7-trihydroxyflavone | C16H12O6 | 300.0634 | 299.0566 | 299.0599 | 13.29 | 269.0447[M-H-CH3O]- | Sappan Wood |  | |
| 33 | 5.73 | [M+CH3COO]- | Carthamone | C21H20O11 | 448.1006 | 507.1139 | 507.1106 | 6.51 | 269.0447[M-H-C6H11O6]- | Safflower |  | |
| 364.0685[M-H-CH8O4]- |  | |
| 34 | 5.88 | [M-H]- | Cartormin | C27H29NO13 | 575.1639 | 574.1561 | 574.1585 | 4.18 | 283.0528[M-H-C12H20O8]- | Safflower |  | |
| 35 | 6.22 | [M+HCOO]- | Benzothiazole | C14H12N2S | 240.0721 | 285.0698 | 285.0722 | 8.42 | 285.0722[M+HCOO]- | Safflower |  | |
| 36 | 7.6 | [M+HCOO]- | Dibenzoxocin | C15H12O2 | 224.0837 | 269.0814 | 269.0842 | 10.41 | 269.0842[M+HCOO]- | Sappan Wood |  | |
| 37 | 7.67 | [M-H]- | 5,6-Dihydroxy-7-o-glucoside-flavone | C21H20O10 | 432.1056 | 431.0978 | 431.0926 | 10.2 | 269.0427[M-H-C6H11O5]- | Manyflower So1omonseal Rhizome |  | |
| 38 | 8.73 | [M+Cl]- | Sagittariol | C19H32O2 | 292.2402 | 327.2091 | 327.2092 | 0.31 | 327.2092[M+Cl]- | Safflower |  | |
| 39 | 11.23 | [M+HCOO]- | Astragaloside II | C43H70O15 | 826.4715 | 871.4691 | 871.4696 | 0.57 | 871.4696[M+HCOO]- | Milkvetch Root |  | |
| 40 | 12.58 | [M+HCOO]- | Astragaloside I | C45H72O16 | 868.482 | 913.4797 | 913.4788 | 0.99 | 913.4788[M+HCOO]- | Milkvetch Root |  | |
| 41 | 12.58 | [M+Cl]- | Astragaloside V | C47H78O19 | 946.5137 | 981.4826 | 981.4795 | 3.16 | 913.5249[M-H-HO2]- | Milkvetch Root |  | |
| 914.4943[M-H-CH4O]- |  | |
| 42 | 28.29 | [M+HCOO]- | (z, e, e)-1,3,5,11-Tridecatetraene-7,9-diyne | C13H12 | 168.0939 | 213.0916 | 213.0931 | 7.04 | 213.0931[M+HCOO]- | Safflower |  | |
| 43 | 28.3 | [M+CH3COO]- | (z,z)-1,3,11-Tridecatriene-5,7,9-triyne | C13H10 | 166.0783 | 225.0916 | 225.094 | 10.67 | 225.0940[M+CH3COO]- | Safflower |  | |
| 44 | 28.34 | [M+HCOO]- | (-)-Methyl selina-3,11-dien-14-oate | C16H24O2 | 248.1776 | 293.1753 | 293.1718 | 11.95 | 92.9982[M-H-C11H23]- | Sappan Wood |  | |
| 119.0502[M-H-C8H14O]- |  | |
| 121.0659[M-H-C8H15O]- |  | |
|  |  |  |  |  |  |  |  |  |  |  |  | |
|  |  |  |  |  |  |  |  |  |  |  |  | |
| 45 | 2.51 | [M+H]+ | 6-Hydroxykaempferol-7-o-glucoside | C21H20O12 | 464.0955 | 465.1033 | 465.1043 | 2.15 | 115.0466[M+H-C16H13O9]+ | Safflower |  | |
| 303.0478[M+H-C6H9O5]+ |  | |
| 319.0410[M+H-C6H9O4]+ |  | |
| 46 | 2.92 | [M+H]+ | 5,6-Dihydroxy-7-o-glucoside-flavone | C21H20O10 | 432.1056 | 433.1135 | 433.1136 | 0.23 | 301.0650[M+H-C9H7O]+ | Manyflower So1omonseal Rhizome |  | |
| 303.0499[M+H-C6H9O3]+ |  | |
| 313.0701[M+H-C4H7O4]+ |  | |
| 314.0578[M+H-C8H6O]+ |  | |
| 331.0861[M+H-C4H5O3]+ |  | |
| 47 | 2.92 | [M+H]+ | Neocarthamin | C21H22O11 | 450.1162 | 451.124 | 451.1217 | 5.01 | 303.0468[M+H-C6H11O4]+ | Safflower |  | |
| 313.0705[M+H-C4H9O4]+ |  | |
| 314.0578[M+H-C8H8O2]+ |  | |
| 331.0861[M+H-C4H7O4]+ |  | |
| 415.0991[M+H-H3O2]+ |  | |
| 48 | 2.92 | [M+Na]+ | Neosappanone a | C33H28O11 | 600.1632 | 623.1529 | 623.1545 | 2.57 | 91.0478[M+H-C30H21O7]+ | Sappan Wood |  | |
| 97.0239[M+H-C28H23O8]+ |  | |
| 121.0223[M+H-C26H23O8]+ |  | |
| 289.0664[M+H-C18H15O5]+ |  | |
| 301.0650[M+H-C17H15O5]+ |  | |
| 49 | 2.92 | [M+H]+ | Ombuin | C17H14O7 | 330.074 | 331.0818 | 331.0818 | 0 | 147.0382[M+H-C8H7O5]+ | Sappan Wood |  | |
| 193.0050[M+H-C8H9O2]+ |  | |
| 207.0265[M+H-C7H7O2]+ |  | |
| 301.0650[M+H-CHO]+ |  | |
| 303.0468[M+H-C2H3]+ |  | |
| 50 | 2.92 | [M+K]+ | Safflomin a | C27H32O16 | 612.169 | 651.1327 | 651.1367 | 6.14 | 651.1367[M+K]+ | Safflower |  | |
| 51 | 3.18 | [M+H]+ | Calycosin | C16H12O5 | 284.0685 | 285.0763 | 285.0737 | 9.12 | 285.0737[M+H]+ | Milkvetch Root |  | |
| 52 | 3.18 | [M+H]+ | Onjixanthone i | C16H14O6 | 302.079 | 303.0869 | 303.0885 | 5.28 | 287.0563[M+H-CH3]+ | Safflower |  | |
| 53 | 3.33 | [M+Na]+ | 1-Ribityl-2,3-diketo-1,2,3,4-tetrahydro-6,7-dimethyl-quinoxaline | C15H20N2O6 | 324.1321 | 347.1219 | 347.1227 | 2.31 | 144.0735[M+H-C6H12O6]+ | Safflower |  | |
| 54 | 3.48 | [M+H]+ | Brazilein | C16H12O5 | 284.0685 | 285.0763 | 285.0737 | 9.12 | 229.0465[M+H-C3H3O]+ | Sappan Wood |  | |
| 237.0545[M+H-CH3O2]+ |  | |
| 239.0651[M+H-CHO2]+ |  | |
| 251.0710[M+H-HO2]+ |  | |
| 267.0585[M+H-HO]+ |  | |
| 55 | 3.5 | [M+K]+ | Episappanol | C16H16O6 | 304.0947 | 343.0584 | 343.0587 | 0.87 | 147.0371[M+H-C7H9O4]+ | Sappan Wood |  | |
| 165.0626[M+H-C7H7O3]+ |  | |
| 183.0731[M+H-C7H5O2]+ |  | |
| 195.0730[M+H-C6H5O2]+ |  | |
| 251.0710[M+H-H5O3]+ |  | |
| 56 | 3.5 | [M+NH4]+ | Methyl brevifolin carboxylate | C14H10O8 | 306.0376 | 324.0719 | 324.0717 | 0.62 | 139.0449[M+H-C7H3O5]+ | Sappan Wood |  | |
| 141.0615[M+H-C7HO5]+ |  | |
| 155.0425[M+H-C7H3O4]+ |  | |
| 185.0518[M+H-C6HO3]+ |  | |
| 205.0573[M+H-C3HO4]+ |  | |
| 57 | 3.61 | [M+H]+ | Genipingentiobioside | C23H34O15 | 550.1898 | 551.1976 | 551.196 | 2.9 | 551.1960[M+H]+ | Leech |  | |
| 58 | 3.82 | [M+H]+ | Safflower yellow A | C27H30O15 | 594.1585 | 595.1663 | 595.1693 | 5.04 | 181.0077[M+H-C19H25O10]+ | Safflower |  | |
| 247.0258[M+H-C15H23O9]+ |  | |
| 289.0774[M+H-C12H17O9]+ |  | |
| 303.0442[M+H-C12H19O8]+ |  | |
| 433.1174[M+H-C6H9O5]+ |  | |
| 59 | 3.83 | [M+NH4]+ | Aflatoxing1 | C17H12O7 | 328.0583 | 346.0927 | 346.0902 | 7.23 | 229.0517[M+H-C4H3O3]+ | Leech |  | |
| 247.0258[M+H-C5H5O]+ |  | |
| 259.0201[M+H-C4H5O]+ |  | |
| 303.0442[M+H-C2H]+ |  | |
| 60 | 3.83 | [M+H]+ | Carthamidin | C15H12O6 | 288.0634 | 289.0712 | 289.0763 | 8.3 | 119.0421[M+H-C7H5O5]+ | Safflower |  | |
| 169.0054[M+H-C8H7O]+ |  | |
| 61 | 3.85 | [M+NH4]+ | Saffloryellow | C27H30O16 | 610.1534 | 628.1878 | 628.1808 | 11.12 | 259.0201[M+H-C14H23O10]+ | Safflower |  | |
| 289.0774[M+H-C12H17O10]+ |  | |
| 303.0442[M+H-C12H19O9]+ |  | |
| 327.0184[M+H-C11H23O8]+ |  | |
| 433.1174[M+H-C6H9O6]+ |  | |
| 62 | 4.02 | [M+H]+ | Kaempferol | C15H10O6 | 286.0477 | 287.0556 | 287.0531 | 8.71 | 287.0531[M+H]+ | Milkvetch Root and Safflower |  | |
| 63 | 4.35 | [M+Na]+ | Uridine | C9H12N2O6 | 244.0695 | 267.0593 | 267.0612 | 7.12 | 72.0375[M+H-C6H6NO5]+ | Milkvetch Root |  | |
| 181.0591[M+H-CH3O3]+ |  | |
| 195.0760[M+H-HO3]+ |  | |
| 197.0489[M+H-CH3O2]+ |  | |
| 211.0716[M+H-HO2]+ |  | |
| 64 | 4.5 | [M+NH4]+ | Suffruticoside A | C27H32O16 | 612.169 | 630.2034 | 630.1962 | 11.43 | 165.0630[M+H-C18H23O13]+ | Milkvetch Root |  | |
| 65 | 4.73 | [M+H]+ | 3'-Hydroxy-4--methoxyisoflavone-7-o-beta-d-glucoside | C22H22O10 | 446.1213 | 447.1291 | 447.1251 | 8.95 | 169.0566[M+H-C14H13O6]+ | Milkvetch Root |  | |
| 196.0451[M+H-C13H14O5]+ |  | |
| 197.0510[M+H-C13H13O5]+ |  | |
| 253.0407[M+H-C7H13O6]+ |  | |
| 270.0465[M+H-C7H12O5]+ |  | |
| 66 | 4.88 | [M+NH4]+ | Cartormin | C27H29NO13 | 575.1639 | 593.1983 | 593.1985 | 0.34 | 147.0388[M+H-C18H22NO11]+ | Safflower |  | |
| 303.0353[M+H-C13H20O6]+ |  | |
| 313.0820[M+H-C14H14O5]+ |  | |
| 67 | 5.55 | [M+H]+ | Isorhamnetin | C16H12O7 | 316.0583 | 317.0661 | 317.0667 | 1.89 | 317.0667[M+H]+ | Milkvetch Root |  | |
| 68 | 5.6 | [M+H]+ | Protosappanin A | C15H12O5 | 272.0685 | 273.0763 | 273.0746 | 6.23 | 273.0746[M+H]+ | Sappan Wood |  | |
| 69 | 5.73 | [M+H]+ | Rhamnocitrin | C16H12O6 | 300.0634 | 301.0712 | 301.0742 | 9.97 | 153.0131[M+H-C9H7O2]+ | Milkvetch Root |  | |
| 229.0495[M+H-C3H3O2]+ |  | |
| 271.0601[M+H-CHO]+ |  | |
| 70 | 6.05 | [M+H]+ | Sappanone B | C16H14O6 | 302.079 | 303.0869 | 303.0885 | 5.28 | 269.0763[M+H-HO2]+ | Sappan Wood |  | |
| 71 | 7.44 | [M+Na]+ | 6-Dimethoxy-isoflavane | C23H28O10 | 464.1682 | 487.158 | 487.1608 | 5.74 | 487.1608[M+Na]+ | Milkvetch Root |  | |
| 72 | 9.04 | [M+K]+ | (z, e, e)-1,3,5,11-Tridecatetraene-7,9-diyne | C13H12 | 168.0939 | 207.0576 | 207.0585 | 4.35 | 207.0585[M+K]+ | Safflower |  | |
| 73 | 9.52 | [M+H]+ | Formononetin | C16H12O4 | 268.0736 | 269.0814 | 269.0845 | 11.52 | 237.0589[M+H-CH3O]+ | Milkvetch Root |  | |
| [M+Na]+ | 253.0495[M+H-CH3]+ |  | |
| 74 | 12.11 | [M+Na]+ | Astragaloside I | C45H72O16 | 868.482 | 891.4718 | 891.4687 | 3.48 | 119.0736[M+H-C40H61O13]+ | Milkvetch Root |  | |
| 711.3990[M+H-C8H13O3]+ |  | |
| 775.4300[M+H-C3H9O3]+ |  | |
| 75 | 14.82 | [M+H]+ | Linolenicacid | C18H30O2 | 278.2246 | 279.2324 | 279.2353 | 10.39 | 279.2353[M+H]+ | Safflower |  | |
| 76 | 15.82 | [M+NH4]+ | Genioisidic acid | C16H22O10 | 374.1213 | 392.1557 | 392.151 | 11.99 | 392.1510[M+NH4]+ |  | |
| 77 | 21.54 | [M+NH4]+ | N-Candicine | C11H18NO | 180.1388 | 198.1732 | 198.1748 | 8.08 | 91.0446[M+H-C4H11NO]+ | Milkvetch Root |  | |
| 93.0616[M+H-C4H9NO]+ |  | |
| 107.0765[M+H-C3H7NO]+ |  | |
| 139.1009[M+H-C3H5]+ |  | |
| 149.1225[M+H-CH3O]+ |  | |
| 78 | 28.36 | [M+Na]+ | Sucrose | C12H22O11 | 342.1162 | 365.106 | 365.1099 | 10.68 | 365.1099[M+Na]+ | Milkvetch Root |  | |

**Supplementary Table S2**

| **Name** | **Species** | **Forward primer** | **Reverse primer** |
| --- | --- | --- | --- |
| PPARγ | Human | GGGATCAGCTCCGTGGATCT | TGCACTTTGGTACTCTTGAAGTT |
| NF-κB p65 | Human | ATGTGGAGATCATTGAGCAGC | CCTGGTCCTGTGTAGCCATT |
| IL-1β | Human | ATGATGGCTTATTACAGTGGCAA | GTCGGAGATTCGTAGCTGGA |
| IL-6 | Human | ACTCACCTCTTCAGAACGAATTG | CCATCTTTGGAAGGTTCAGGTTG |
| TNF-α | Human | GAGGCCAAGCCCTGGTATG | CGGGCCGATTGATCTCAGC |
| GAPDH | Human | GGACCTGACCTGCCGTCTAG | GTAGCCCAGGATGCCCTTGA |
| PPARγ | Mouse | GGAAGACCACTCGCATTCCTT | GTAATCAGCAACCATTGGGTCA |
| LXRα | Mouse | ACAGAGCTTCGTCCACAAAAG | GCGTGCTCCCTTGATGACA |
| ABCA1 | Mouse | GCTTGTTGGCCTCAGTTAAGG | GTAGCTCAGGCGTACAGAGAT |
| ABCG1 | Mouse | GTGGATGAGGTTGAGACAGACC | CCTCGGGTACAGAGTAGGAAAG |
| GAPDH | Mouse | AAGAAGGTGGTGAAGCAGG | GAAGGTGGAAGAGTGGGAGT |
